# Supplementary material for: Effect of national holidays on health outcomes of patients receiving peritoneal dialysis in a single center over a ten-year period
Source: PubMed Central journal article supplement (PMC9848312; doi:10.1080/0886022x.2022.2153697), 2023-01-16
Supplement: IRNF_A_2153697_SM9540.pdf [file IRNF_A_2153697_SM9540.pdf]

**Supplemental Table 1 The specific time or month corresponding to each holiday.**

| <b>Holiday</b>       | <b>Chinese lunar calendar</b> | <b>Gregorian calendar</b> |
|----------------------|-------------------------------|---------------------------|
| New Year             | —                             | January 1st               |
| Chinese New Year     | January 1st                   | January or February       |
| Tomb-Sweeping Day    | —                             | April 4th to April 6th    |
| Labor Day            | —                             | May 1st                   |
| Dragon Boat Festival | May 5th                       | June                      |
| Mid-Autumn Festival  | August 15th                   | September or October      |
| National Day         | —                             | October 1st               |

**Supplementary Table 2 Comparison of causes of peritonitis in holiday and non-holiday groups.**

| <b>Peritonitis causes</b>    | <b>Holiday group</b> | <b>Non-holiday group</b> | <b><i>p</i> Value</b> |
|------------------------------|----------------------|--------------------------|-----------------------|
| Enteric causes               | 20(50.00%)           | 76(42.53%)               | 0.370                 |
| Secondary to other infection | 10(25.00%)           | 19(10.34%)               | <b><i>0.015</i></b>   |
| Touch contamination          | 2(5.00%)             | 32(17.24%)               | 0.075                 |
| Other causes                 | 8(20.00%)            | 53(29.89%)               | 0.227                 |
| Number of all episodes       | 40(100%)             | 180(100%)                | <b><i>0.017</i></b>   |

Bold and italic indicate  $p < 0.05$ .
